# Supplementary material for: Application of an optimized flow cytometry-based quantification of Platelet Activation (PACT): Monitoring platelet activation in platelet concentrates
Source: PubMed Central journal article supplement (PMC5313179; doi:10.1371/journal.pone.0172265), 2017-02-16

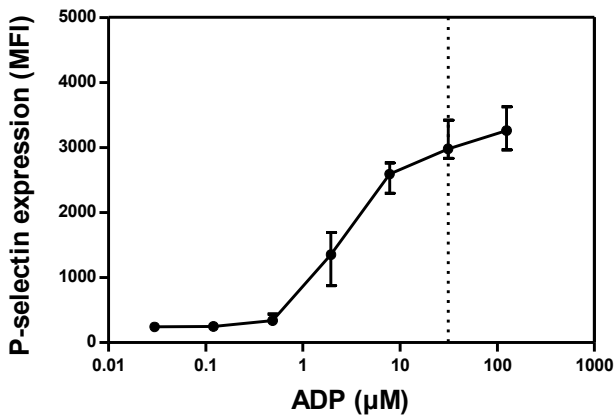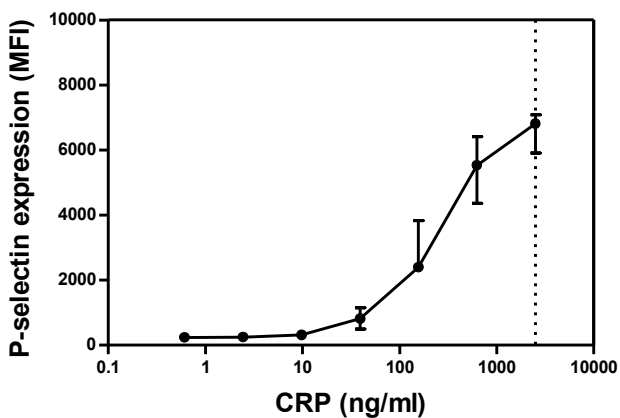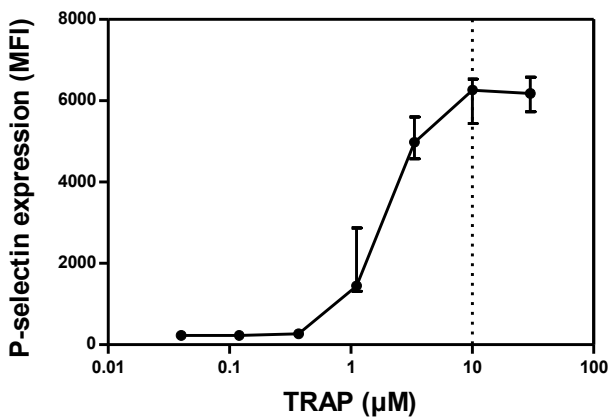

Supplement: pone.0172265.s001.pdf [file pone.0172265.s001.pdf]
